# Supplementary material
Source: MDPI journal article supplement (https://www.mdpi.com/2673-7140/3/1/4)
Supplement: s1 [file s1]

Supplementary File S1

## Prominent Effects of Zinc Oxide Nanoparticles on Roots of Rice (*Oryza sativa* L.) Grown under Salinity Stress

Abhishek Singh <sup>1,\*</sup>, Rakesh Singh Sengar <sup>1</sup>, Uday Pratap Shahi <sup>2</sup>, Vishnu D. Rajput <sup>3</sup>, Tatiana Minkina <sup>3</sup> and Karen A. Ghazaryan <sup>4</sup>

<sup>1</sup> Department of Agricultural Biotechnology, College of Agriculture, Sardar Vallabhbhai Patel University of Agriculture and Technology, Meerut 250110, India; sengarbiotech07@gmail.com

<sup>2</sup> Department of Soil Science, College of Agriculture, Sardar Vallabhbhai Patel University of Agriculture and Technology, 250110 Meerut, India; upshahi@gmail.com

<sup>3</sup> Academy of Biology and Biotechnology, Southern Federal University, 344090 Rostov-on-Don, Russia; rajput.vishnu@gmail.com (V.D.R.); tminkina@mail.ru (T.M.)

<sup>4</sup> Yerevan State University, Yerevan 0025, Armenia; kghazaryan@ysu.am

\* Correspondence: intmsc.abhi@gmail.com; Tel.: +91-880-095-5671

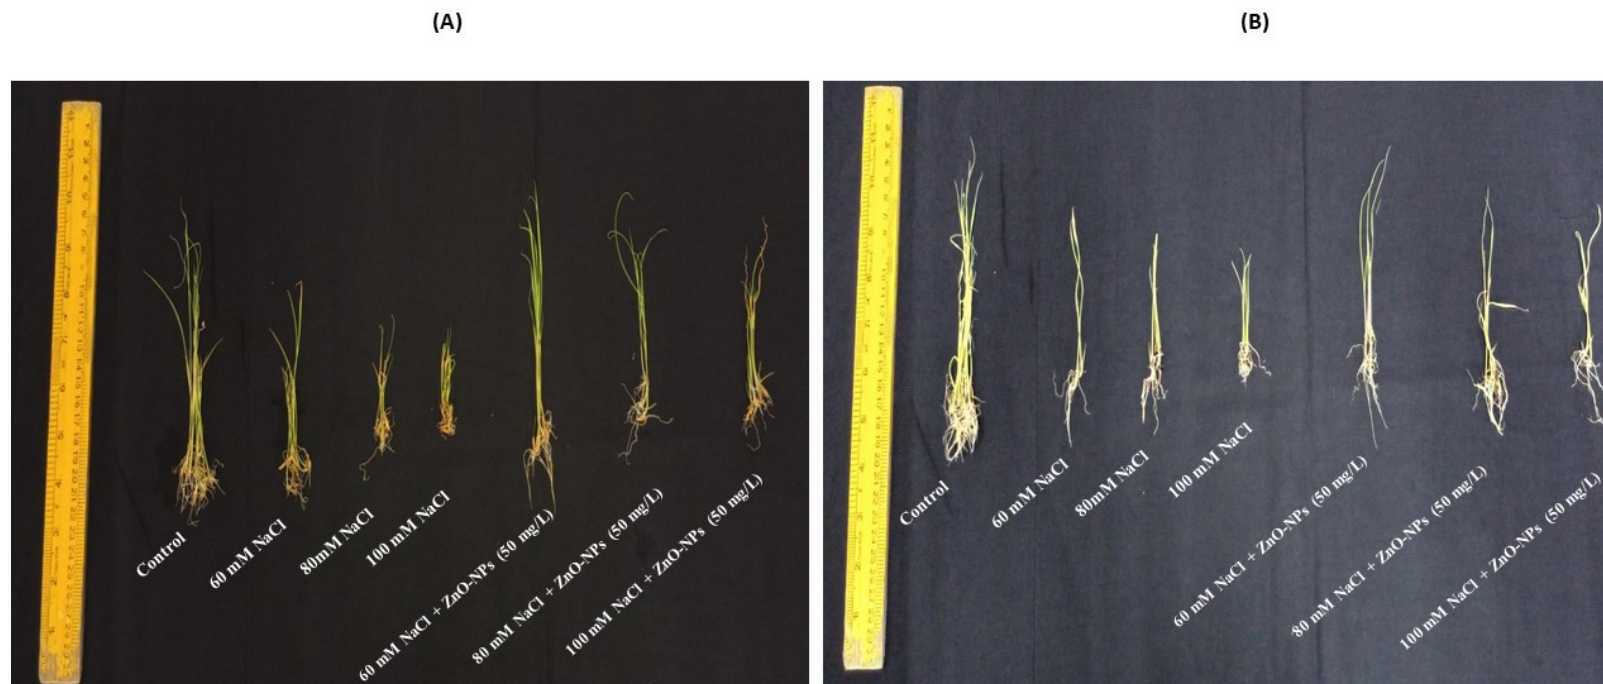

**Figure S1. Impact of ZnO NPs in control and saline conditions and morphology of the root of (A) CSR 30 and (B) Kargi after 14 days of treatments.**
